# Supplementary material for: Fruit and vegetable intake and liver cancer risk: a meta-analysis of prospective cohort studies
Source: Royal Society of Chemistry journal article supplement (doi:10.1039/c9fo00804g), 2019-01-01
Supplement: c9fo00804g1.pdf [file c9fo00804g1.pdf]

Supplementary Table 1. Quality assessment of included cohort with Newcastle-Ottawa Scale criteria

| Author    | Representativeness of the exposed cohort | Selection of the unexposed cohort | Ascertainment of exposure | Demonstration that outcome of interest at start of study | Comparability of cohorts on the basis of the design or analysis | Outcome assessment | Follow-up long enough for the outcomes to occur | Adequacy of follow-up of cohorts | Total quality scores |
|-----------|------------------------------------------|-----------------------------------|---------------------------|----------------------------------------------------------|-----------------------------------------------------------------|--------------------|-------------------------------------------------|----------------------------------|----------------------|
| Bamia     | ☆                                        | ☆                                 | -                         | ☆                                                        | ☆☆                                                              | ☆                  | ☆                                               | ☆                                | ☆☆☆☆☆☆☆☆             |
| Chen      | ☆                                        | ☆                                 | -                         | ☆                                                        | ☆☆                                                              | -                  | ☆                                               | ☆                                | ☆☆☆☆☆☆☆☆             |
| Gao       | ☆                                        | ☆                                 | -                         | ☆                                                        | ☆☆                                                              | -                  | ☆                                               | -                                | ☆☆☆☆☆☆               |
| George    | ☆                                        | ☆                                 | -                         | ☆                                                        | ☆☆                                                              | -                  | ☆                                               | -                                | ☆☆☆☆☆☆               |
| Kurahashi | ☆                                        | ☆                                 | -                         | ☆                                                        | ☆☆                                                              | -                  | ☆                                               | ☆                                | ☆☆☆☆☆☆☆☆             |
| Pham      | ☆                                        | ☆                                 | -                         | ☆                                                        | ☆☆                                                              | -                  | ☆                                               | ☆                                | ☆☆☆☆☆☆☆☆             |
| Sauvaget  | ☆                                        | ☆                                 | -                         | ☆                                                        | ☆☆                                                              | -                  | ☆                                               | -                                | ☆☆☆☆☆☆               |
| Yu        | ☆                                        | ☆                                 | -                         | ☆                                                        | ☆☆                                                              | ☆                  | ☆                                               | ☆                                | ☆☆☆☆☆☆☆☆             |
| Zhang     | ☆                                        | ☆                                 | -                         | ☆                                                        | ☆☆                                                              | -                  | ☆                                               | ☆                                | ☆☆☆☆☆☆☆☆             |

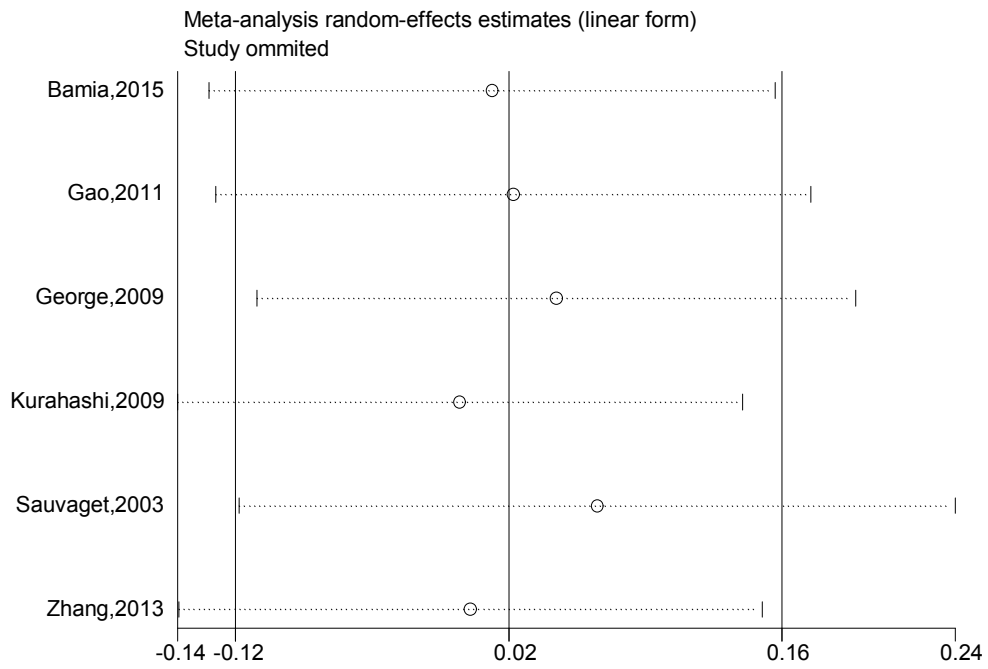

Supplementary Figure 1. Sensitivity analysis with respect to fruit intake associated with liver cancer risk

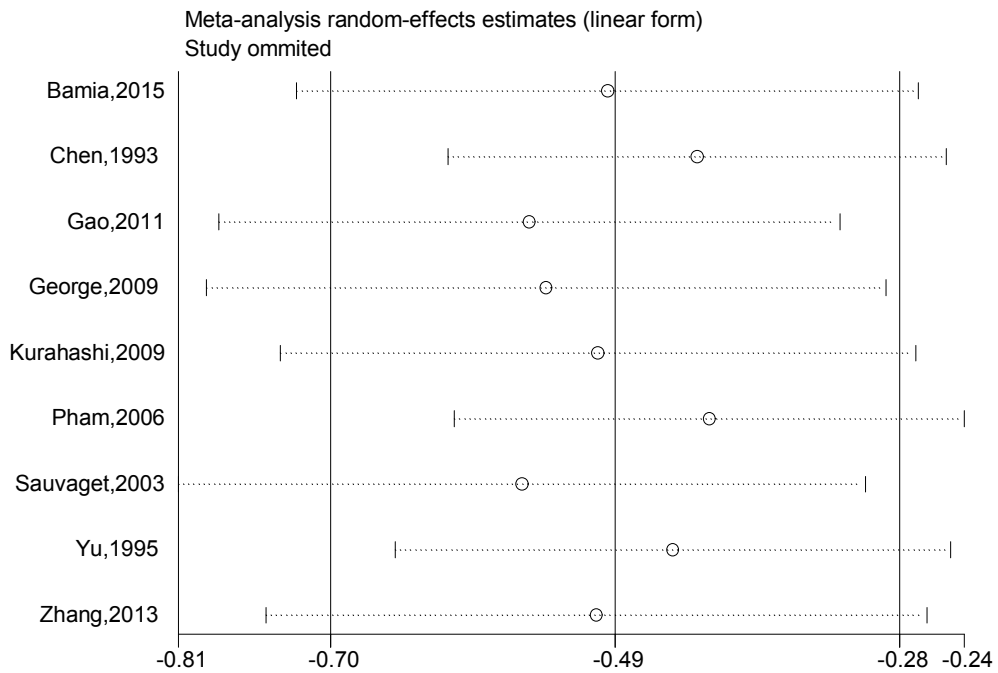

Supplementary Figure 2. Sensitivity analysis with respect to vegetable intake associated with liver cancer risk
